# Supplementary material
Source: Springer Nature journal article supplement (https://www.springermedizin.de/resource/supplementary/12985_2010_1143_MOESM4_ESM.pdf/9609682)

C

| SN ( $\mu\text{g}$ ) |       | <u>Intf</u><br>(10IU) | PA<br>(100 $\mu\text{g}$ ) |
|----------------------|-------|-----------------------|----------------------------|
| (50)                 | (100) |                       |                            |

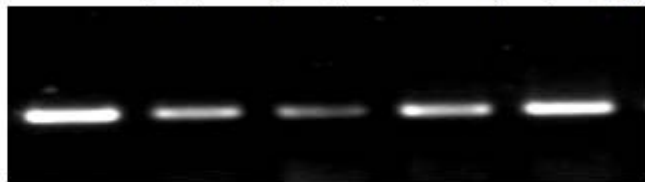

→ HCV NS3

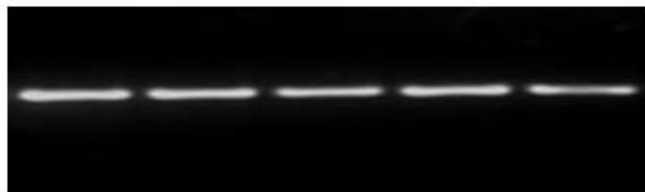

→ GAPDH

Supplement: MOESM4 [file 9609682]
